# Supplementary material for: H2S- and Redox-State-Mediated PTP1B S-Sulfhydration in Insulin Signaling
Source: MDPI journal article supplement (doi:10.3390/ijms24032898), 2023-02-02
Supplement: s1 [file s1]

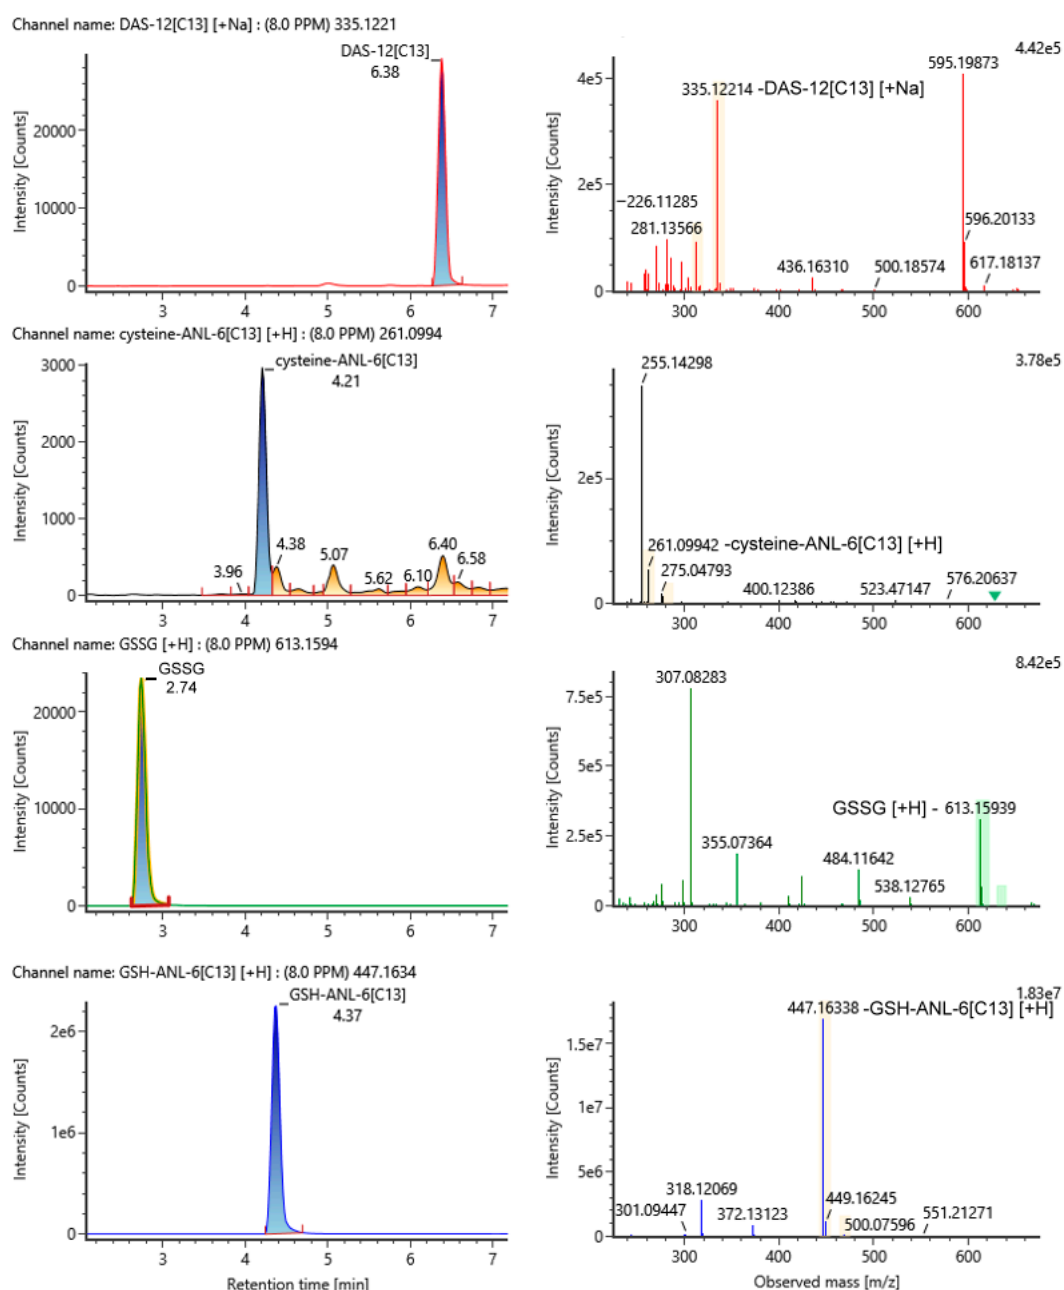

**Figure S1.** Representative chromatogram and mass spectrum of detected thiol metabolites. DAS-12[C13]:  $\text{H}_2\text{S}-^{13}\text{C}_6$ -2-IAN derivative; cysteine-ANL-6[C13]: cysteine- $^{13}\text{C}_6$ -2-IAN derivative; GSSG: oxidized GSH; GSH-ANL-6[C13]: GSH- $^{13}\text{C}_6$ -2-IAN derivative. [+Na]: compound-sodium adducts; [H+]: compound-proton adducts.
